# Supplementary material for: Identification of two integration sites in favor of transgene expression in Trichoderma reesei
Source: PubMed Central journal article supplement (PMC5956788; doi:10.1186/s13068-018-1139-3), 2018-05-17
Supplement: 13068_2018_1139_MOESM1_ESM.pdf [file 13068_2018_1139_MOESM1_ESM.pdf]

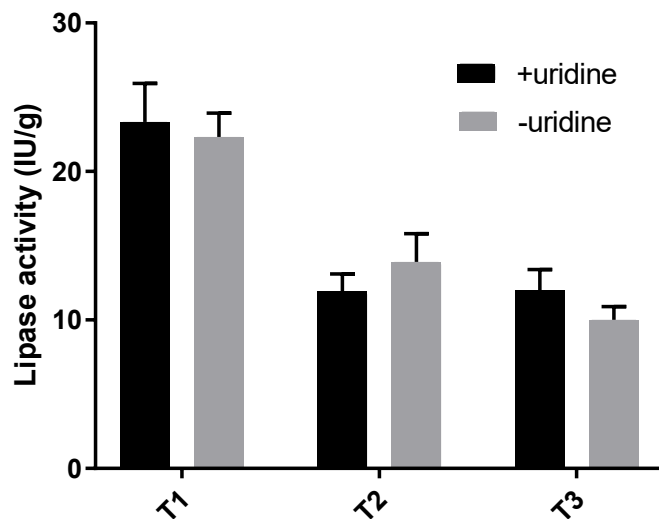

**Figure S1: Analysis of the effect of uridine on protein secretion in strains harboring *pyr4* gene.** Lipase activities of three independent transformants strains in the supernatant of 96h post-inoculation in MM media with 2% of lactose with or without 5mM uridine. All the values in the figure are the mean value of three replicates. Error bars are the standard deviation (SD) between these replicates.
