# Supplementary material for: Identification of two integration sites in favor of transgene expression in Trichoderma reesei
Source: PubMed Central journal article supplement (PMC5956788; doi:10.1186/s13068-018-1139-3), 2018-05-17
Supplement: 13068_2018_1139_MOESM2_ESM.pdf [file 13068_2018_1139_MOESM2_ESM.pdf]

## Additional file 2

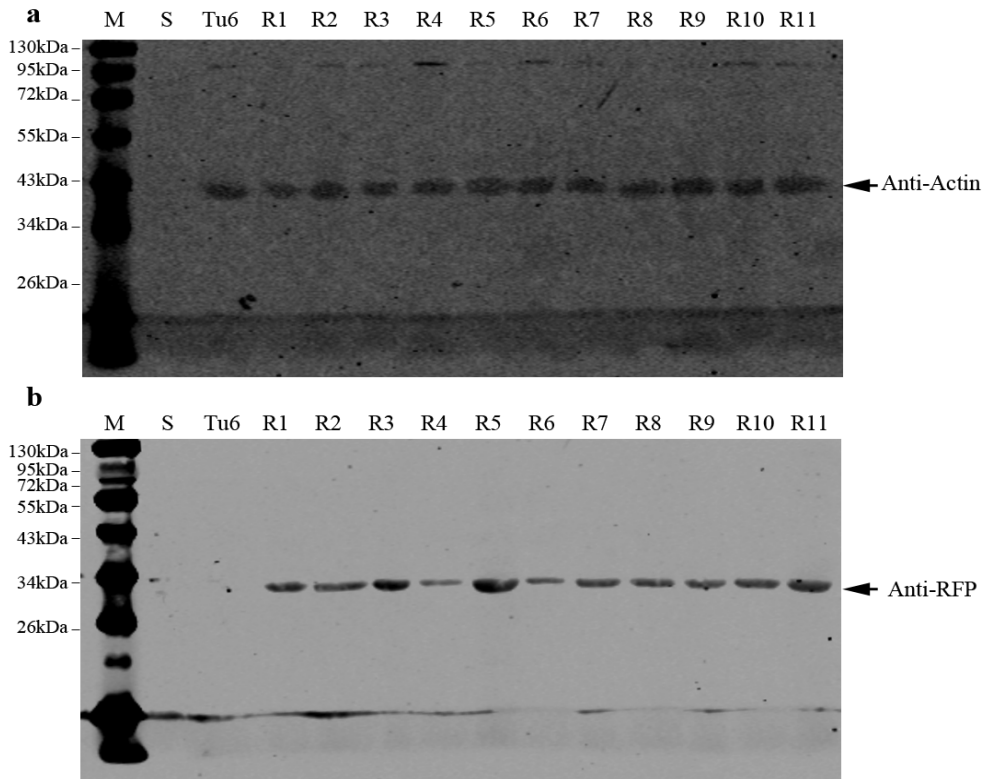

**Figure S2: The raw data of the western blot analysis of the intracellular expression of beta-actin (a) and RFP (b) from the mycelia lysate.** Protein samples were extracted from mycelia in 120 h cultures containing MM media with 1% Avicel as the carbon source from 24 well plates. M indicated the protein marker, S indicated the supernatant sample from the same culture.
