# Supplementary material for: Identification of two integration sites in favor of transgene expression in Trichoderma reesei
Source: PubMed Central journal article supplement (PMC5956788; doi:10.1186/s13068-018-1139-3), 2018-05-17
Supplement: 13068_2018_1139_MOESM3_ESM.pdf [file 13068_2018_1139_MOESM3_ESM.pdf]

## Additional file 3

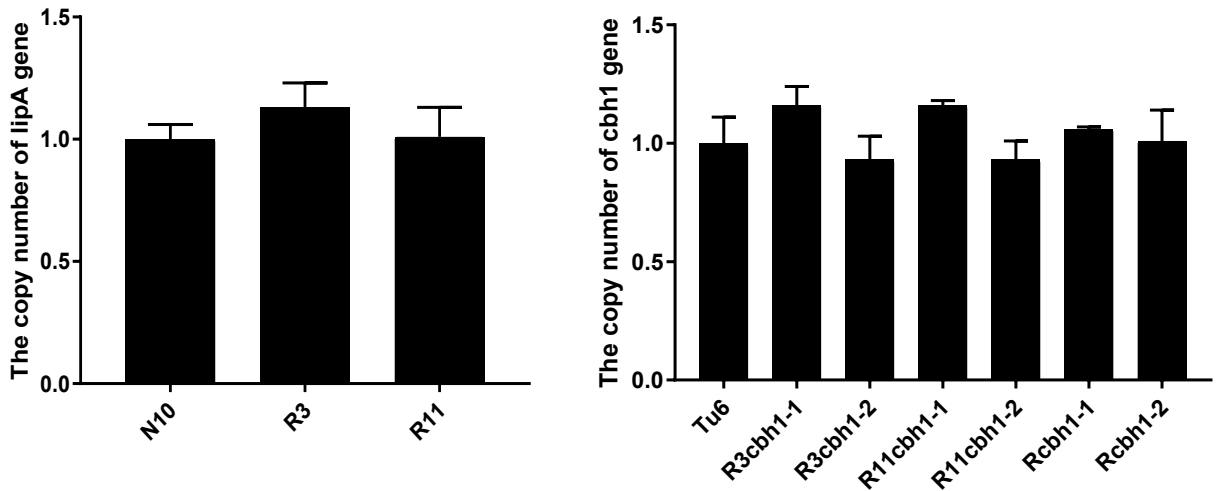

**Figure S3: qPCR to determine the copy number of *lipA* gene (a) and *cbh1* gene (b) in the indicated strains.** Actin gene was used as the reference gene to normalize the expression level of the test genes. N10 strain was used to quantify the copy number of *lipA* gene and Tu6 strain was used to quantify the copy number of *cbh1* gene.
