# Supplementary material for: Identification of two integration sites in favor of transgene expression in Trichoderma reesei
Source: PubMed Central journal article supplement (PMC5956788; doi:10.1186/s13068-018-1139-3), 2018-05-17
Supplement: 13068_2018_1139_MOESM4_ESM.pdf [file 13068_2018_1139_MOESM4_ESM.pdf]

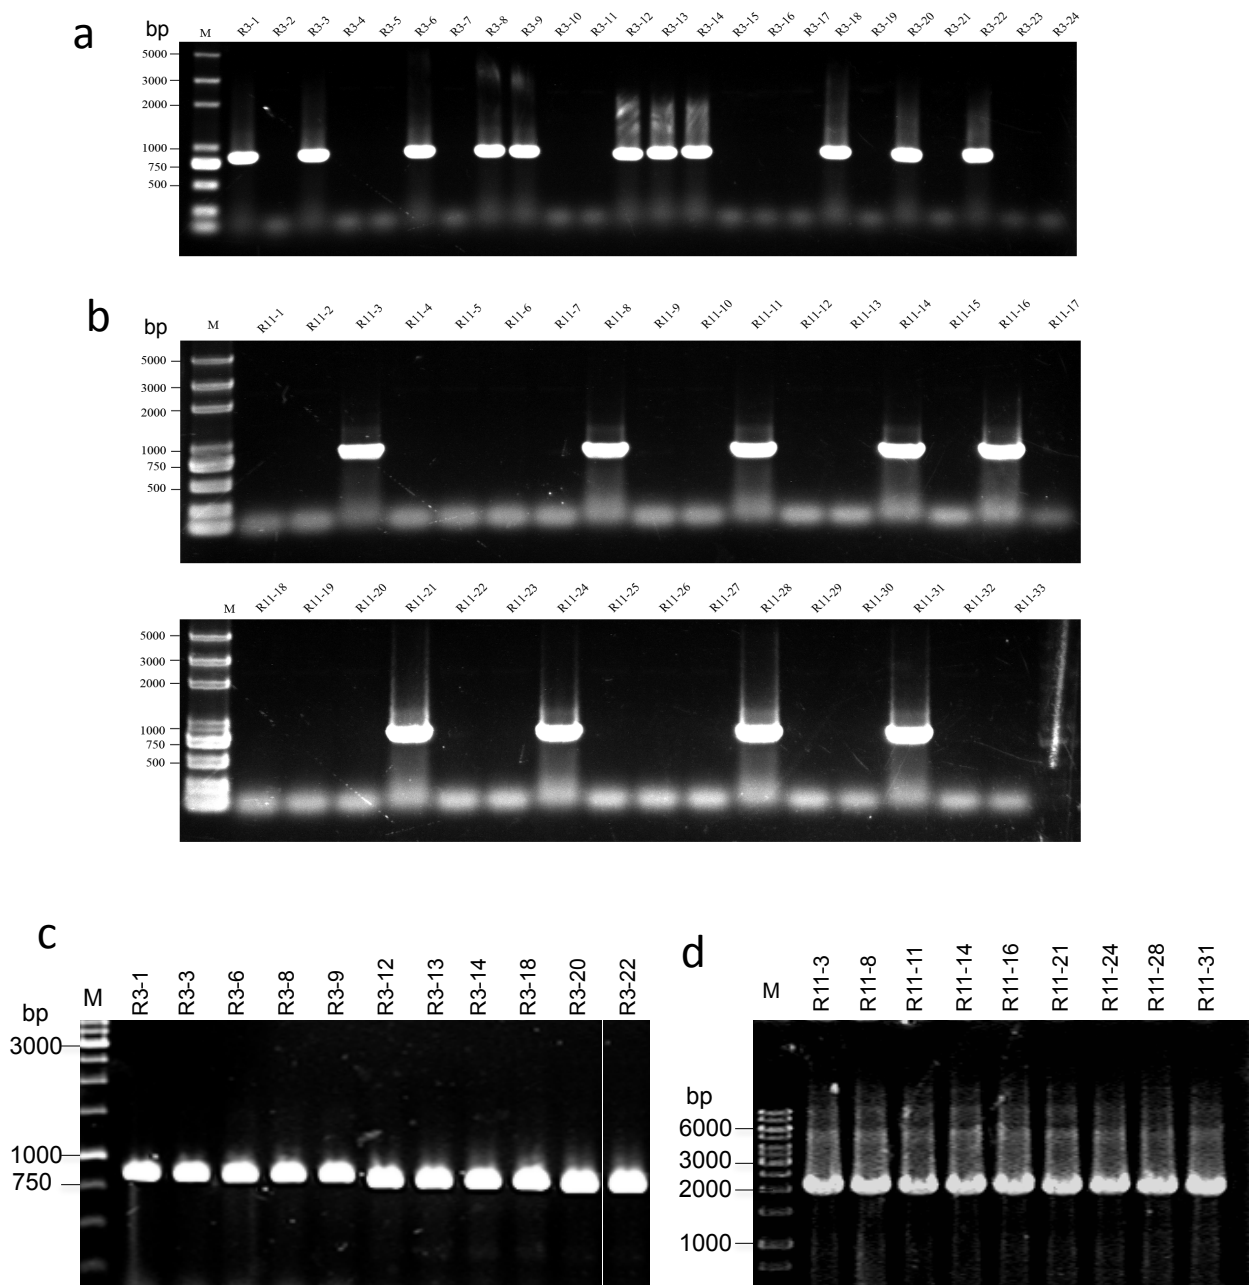

**Figure S4: Genotyping of the recovered plasmids by diagnostic PCR. a, b:** Colony PCR to verify the existence of *lipA* gene in the rescued plasmids from strain R3 (a) and R11 (b) using the primer pairs Lip-F/R, which targeted on the *lipA* gene. **c, d:** PCR amplification to verify the recovered plasmids from R3 (c) and R11 (d) were identical by using the primer pairs VR3-F/R and VR11-F/R respectively.
